1 **Title:**  
2 Enhanced 40 and 80 Hz Auditory Steady State Responses in Idiopathic Tinnitus  
3

4 **Article Type:**  
5 Research article.  
6

7 **Authors:**  
8 Zahra Ghasemahmad<sup>1,2,3</sup>, Saeid Mahmoudian<sup>4</sup>, Daniel Gavazzi<sup>5</sup>, Shohreh Jalaei<sup>6</sup>, Saeid Farahani<sup>1</sup>  
9

10 **Affiliations:**  
11 <sup>1</sup>Department of Audiology, School of Rehabilitation, Tehran University of Medical Sciences,  
12 Tehran, Iran  
13 <sup>2</sup>Massachusetts Eye and Ear, Boston, MA, USA  
14 <sup>3</sup>Harvard Medical School, Boston, MA, USA  
15 <sup>4</sup>ENT and Head and Neck Research Center, The Five Senses Health Institute, School of Medicine,  
16 Iran University of Medical Sciences, Tehran, Iran  
17 <sup>5</sup>Hiram College, School of Science and Technology, Hiram, Ohio, USA  
18 <sup>6</sup>Physical Therapy Department, School of Rehabilitation, Tehran University of Medical Sciences,  
19 Tehran, Iran  
20

21 **Corresponding author:**  
22 Zahra Ghasemahmad, Ph.D.  
23 <sup>1</sup>Department of Audiology, School of Rehabilitation, Tehran University of Medical Sciences,  
24 Tehran, Iran  
25 <sup>2</sup>Massachusetts Eye and Ear, Boston, MA, USA  
26 <sup>3</sup>Harvard Medical School, Boston, MA, USA  
27  
28 Email: zghasemahmad@gmail.com  
29

30

31

32

33

34

35

36

37

## ABSTRACT

38  
39  
40  
41  
42  
43  
44  
45  
46  
47  
48  
49  
50  
51  
52  
53  
54  
55  
56  
57  
58  
59  
60

**Objectives:** This study aimed to investigate changes in auditory processing using auditory steady state responses (ASSR) in patients with idiopathic tinnitus.

**Method:** 19 tinnitus patients and 23 control subjects without tinnitus were examined with multiple ASSR. Three modulation frequencies of 20, 40, and 80 HZ were tested and the steady state responses were compared between tinnitus and control group. Further, the thresholds in ipsi- and contralateral side to ear with tinnitus were compared.

**Results:** Our findings showed no significant difference in ASSR thresholds in ipsi- and contralateral side in tinnitus patients. However, we observed enhanced ASSRs at 40 and 80 Hz modulations in patients with idiopathic tinnitus compared to no-tinnitus control subjects.

**Conclusions:** The results of this study suggest possible sensory deficits along higher order auditory regions in patients with idiopathic tinnitus. Further, our data indicates a bilateral involvement of auditory pathway in these regions in patients with lateralized tinnitus.

**Keywords:**

Auditory steady state response (ASSR), Normal hearing, Subjective idiopathic tinnitus, Modulation frequency, Midbrain, Auditory cortex

## 61 INTRODUCTION

62 Tinnitus is the disturbing sensation of sound in one ear or both without any external stimulation and  
63 can cover 4.4-15% of any population at any age [1]. 5-15% of society experience chronic sensation of  
64 tinnitus [2]. Although tinnitus has been reported and studied as a symptom for years, neuroscience  
65 theories about tinnitus are very young and most of the findings are based on the results from failed  
66 attempts. Though hearing loss has been recognized as the primary and main reason for tinnitus,  
67 other cases with normal hearing and no diagnosed pathological reason have also been reported [3].  
68 In fact, in over 50% of patients referred to tinnitus clinics, the physiological and electrophysiological  
69 examinations have failed to diagnose the underlying cause of tinnitus and thus, have been classified  
70 as idiopathic [4]. Since tinnitus is merely a symptom and its control and management rely on  
71 diagnosing its underlying cause, the necessity of localizing the involved regions in patients with  
72 idiopathic tinnitus is undeniable.

73 Tinnitus studies have identified various brain regions with abnormal activities along the auditory  
74 pathways. For instance, using positron emission tomography (PET) [6] and functional magnetic  
75 resonance imaging (fMRI) [7-10] have shown changes in auditory cortex in tinnitus patients while  
76 other studies have emphasized the role of inferior colliculus (IC) [11, 12] and medial geniculate body  
77 (MGB) [13, 14]. However, comparing and generalizing the findings between these studies is difficult  
78 [5] for a few reasons. First, as tinnitus is a symptom rather than a disease, including patients with  
79 various etiologies might result in different localization of tinnitus regions as well as diverse treatment  
80 plans. Second, since in most tinnitus studies subjects suffer from hearing loss, it is not clear whether  
81 the abnormal neural activity along the auditory pathway is the result of tinnitus or hearing  
82 loss. Lastly, employing different techniques for examining different brain regions makes drawing  
83 comparisons between studies harder. Thus, such reasons call for the need to employ one technique

84 and apply harder inclusion criteria to subjects to eliminate possible factors that could influence the  
85 localization of tinnitus sites or affected regions.

86 A possible technique for localizing the source of tinnitus is the auditory steady state response (ASSR).  
87 ASSRs are event-related potentials (ERPs) that provide means to evaluate the integrity of auditory  
88 pathways with minimal demands and interventions [15, 16]. ASSR technique allows simultaneous  
89 measurement of the responses originated in various parts of the auditory pathway in both ears and  
90 all carrier frequencies (CF) [17, 18].

91 ASSRs rely on continuous modulated pure tones with different carrier frequencies, usually octave  
92 frequencies of 500–4000 Hz, for measuring activity along auditory pathway [19]. Depending on  
93 modulation frequency (MF), various brain regions have been identified to be responsible for  
94 generating these responses. Studies have suggested the involvement of regions such as brainstem,  
95 midbrain, and auditory cortex responses to 80, 40, and 20 Hz MF, respectively [20,21]. Even though  
96 the ASSR thresholds might not be reliable sources for estimating hearing thresholds in normal hearing  
97 adults [22-24], its ability to test multiple frequencies simultaneously, objectivity, noninvasiveness,  
98 and evaluate various sites along auditory pathway [25] can be an invaluable tool in diagnosis of  
99 auditory deficits such as tinnitus.

100 The goal of the current study was to examine ASSR thresholds in various modulation frequencies in  
101 adults with idiopathic tinnitus and no-tinnitus control. Using an age and gender matched group  
102 allowed us to use a controlled approach to evaluate such cortical and subcortical thresholds in  
103 tinnitus subjects. We evaluated these responses in the two groups for all modulation frequencies and  
104 then compared these results with those in no-tinnitus control. We further assessed the response  
105 magnitudes in ipsi- and contralateral side relative to the ear with tinnitus sensation in patients with

106 idiopathic tinnitus to understand the impact of the tinnitus laterality on the possible changes in these  
107 responses.

108

## 109 **METHOD**

### 110 **Ethical considerations**

111 The study was approved by the local ethics committee at Iran University of Medical Sciences and  
112 Tehran University of Medical Sciences and informed consent was obtained from each participant.

### 113 **Subjects**

114 24 normal hearing adults (15 females and 9 males, 25-40 years old) and 19 tinnitus patients (7  
115 females and 12 males, 25-45 yrs old) with hearing thresholds at or better than 20 dB HL at 6 octave  
116 frequencies: 250, 500, 1000, 2000, 4000 and 8000 Hz participated in this study. The ASSRs from the  
117 control group were used from a previous publication [22]. All tinnitus patients were selected from  
118 the population of tinnitus subjects referred to the tinnitus research center at the otolaryngology  
119 department of the Hazrat Rasool Akram (PBUH) Educational, Research, and Treatment Hospital in  
120 Tehran, Iran. Only subjects without an underlying condition were included in the study. The inclusion  
121 and exclusion criteria can be viewed in Table 1.

122

### 123 **Experimental protocol**

#### 124 **ASSR**

125 ASSR was performed in a soundproof room, and thresholds were measured based on the Hughson-  
126 Westlake approach (10 down-5 up). Air-conducted stimuli were introduced into each ear through an  
127 ER-3A insert earphone (Etymotic Research). Stimuli were generated and presented by the CHARTR EP  
128 system (version 5.3, GN Otometrics) and presented to both ears simultaneously. All the stimuli were

129 100% amplitude-modulated (AM) and 20% frequency-modulated (FM). Response confidence, a  
130 measure of signal to noise ratio and the chance of finding a response, was kept at 95%. The response  
131 confidence in this system is calculated based on magnitude-squared coherence (MSC) algorithm to  
132 detect the probability of response presence relative to surrounding noise [26]. ASSRs were performed  
133 at four carrier frequencies of 500, 1000, 2000, and 4000 Hz and intensity range of 10-80 dB SPL. The  
134 detailed modulation rate choice for each combination of MF and CF are as previously reported here  
135 [22].

136 During each session, subjects relaxed in a supine position on a comfortable bed. Participants were  
137 asked to sleep or relax during the 80 Hz multiple ASSR testing. However, as 20 Hz and 40 Hz ASSR  
138 responses could be affected by sleep participants were engaged in performing simple math problems  
139 to prevent them from falling sleep.

140 Responses were recorded via three scalp electrodes: the active and ground electrodes on the upper  
141 and lower forehead respectively, and the reference electrode on the nape. The impedance of the  
142 electrodes was periodically checked during recordings to maintain low impedance and a good  
143 connection (less than 3 K $\Omega$ ). To minimize movement related artifacts in head and body that could  
144 affect the signal to noise ratio, the participants were asked to stay relaxed and motionless during the  
145 experiment.

#### 146 **Statistical analysis**

147  
148 Due to the smaller sample size, nonparametric tests were used to analyze ASSRs. For comparing the  
149 ASSR thresholds between ipsi- and contralateral sides in tinnitus patients at each combination of  
150 carrier and modulation frequencies, a Wilcoxon signed rank test was used. Results were considered  
151 significant if the *p-value* was less than 0.05. The obtained ASSR thresholds for tinnitus patients and  
152 no-tinnitus control were analyzed and compared using Kruskal Wallis test and were compensated for

153 multiple comparisons using a Bonferroni correction. Thus, the *p-values* in this comparison were  
154 divided by the number of comparisons made, making *p-values* significant at 0.025. All Statistical  
155 analysis was performed using IBM SPSS Statistics version 27. All graphs were generated using custom  
156 written python code.

157

## 158 **RESULTS**

159 PTA and ASSR thresholds were obtained in 19 tinnitus patients and 24 no-tinnitus control. Tinnitus  
160 was lateralized in all patients (9 subjects in the right and 10 in the left ear). All tinnitus patients were  
161 selected based on the inclusion criteria summarized in Table 1.

162 We first sought to compare the ASSR thresholds in the ipsi- and contralateral side relative to the ear  
163 with tinnitus sensation in all tinnitus subjects. The modulation frequencies of 20 and 40 Hz ASSRs are  
164 believed to originate mainly in midbrain and cortex [27], and the auditory pathway in these regions  
165 mostly processes the contralateral input [28]. As a result, the right ear responses were registered for  
166 the left ear and the left ear's responses for the right ear for these two modulation frequencies. The  
167 ipsi- and contralateral ASSRs were recorded respectively.

168 The mean and standard deviation of these responses for each combination of MF and CF are  
169 summarized in Table 2. As shown in this table, the highest (worst) ASSR thresholds are observed for  
170 both ipsi- and contralateral sides in 20 Hz MF, with the highest mean  $\pm$  standard deviation recorded  
171 at 4000 Hz CF ( $54.2 \pm 14.3$  dB SPL in ipsilateral ear vs  $57.9 \pm 11.9$  dB SPL in contralateral side). The  
172 responses in other MFs showed lower average values consistent with previously reported thresholds  
173 in normal hearing adults [22]. The ASSR responses in both ipsi- and contralateral side showed lowest  
174 thresholds at 2000 HZ compared to other carrier frequencies in most MFs. Among all MFs, 40 Hz  
175 showed the lowest thresholds for most carrier frequencies (See Table 2).

176 The single data points of ipsi- and contralateral ASSR thresholds for each combination of these  
177 thresholds are shown in Fig. 1. As evident from these scatterplots, the ipsi- and contralateral ASSRs  
178 showed a linear relationship between the two sides. Further, comparing the ASSR thresholds in ipsi-  
179 and contralateral side in tinnitus patients in each combination of MF and CF showed no significant  
180 differences in ASSRs obtained in the two sides relative to tinnitus perception side (Wilcoxon signed  
181 rank test; see statistical analysis results in Table 3).

182 Next, we sought to compare the obtained ASSRs in tinnitus patients and the no-tinnitus control  
183 group. Figure 2 represents box plots showing the distribution of the thresholds in each group of  
184 subjects for all MFs and CFs. The statistical analysis results are reported in Table 4. The distribution of  
185 the 20 Hz ASSR thresholds for tinnitus subjects showed slightly elevated thresholds in tinnitus  
186 patients compared to control groups (Fig. 2 top row). For instance, the estimated average ASSRs at  
187 2000 Hz in the right ear in tinnitus patients was  $47.9 \pm 12.7$  dB SPL compared to  $43.75 \pm 11$  dB SPL in  
188 the control group. Similarly in the left ear at the same carrier frequency, tinnitus group showed an  
189 average ASSR threshold of  $53.16 \pm 13.35$  dB SPL which was higher than the obtained threshold for the  
190 control group (mean  $\pm$  SD:  $45.4 \pm 11.8$  dB SPL). Such findings were consistently observed across  
191 various CFs (Fig. 2, top row). However, despite such differences, at this modulation the ASSRs  
192 between the two groups showed no significant difference (Kruskal Wallis test;  $p$ -value $>0.025$  in both  
193 right and left ears comparisons, see Table 4 for details).

194 When comparing thresholds at 40 and 80 Hz MFs, we found consistently elevated ASSR thresholds in  
195 tinnitus subjects compared to control (Fig. 2). At 80 Hz, these differences in most carrier frequencies  
196 were more significant in the left compared to the right ear (See Table 4 for the statistical analysis  
197 results).



198 However, at 40 Hz ASSR we observed significantly higher ASSR thresholds in both right and left ear.  
199 Even though, the higher ASSRs were consistently seen in all CFs, this difference was only significant at  
200 some CFs in right or left ear (See Table 4 for details).

201

## 202 **DISCUSSION**

203 The current study examined multiple ASSR thresholds in idiopathic tinnitus patients and normal  
204 hearing control with no tinnitus at MFs 20, 40, and 80 HZ and CFs of 500-4000 Hz. Given that ASSRs  
205 with different modulation frequencies could originate from different cortical and subcortical regions,  
206 this technique allowed us to assess the sensory processing along the auditory pathway from  
207 brainstem to cortex. Our analysis demonstrated enhanced ASSR thresholds in most CFs at 40 and 80  
208 Hz MF corresponding to brainstem, midbrain and cortex. We further observed that the laterality of  
209 tinnitus did not affect these responses significantly. Considering both tinnitus patients and no-tinnitus  
210 control had hearing thresholds within the normal range, we believe that the enhanced responses in  
211 idiopathic tinnitus subjects could indicate possible involvement of these regions in tinnitus  
212 perception.

213

### 214 **The effect of tinnitus on ASSRs with different modulation frequencies**

215 The current study aimed at assessing the changes in ASSRs with different MFs in patients with  
216 idiopathic tinnitus. Analyzing the obtained ASSRs at 80 Hz MF showed significantly enhanced  
217 thresholds in most CFs in these patients compared to no-tinnitus control. As the main contributors to  
218 ASSRs at MFs higher than 60 Hz are auditory brainstem nuclei such as cochlear nucleus and inferior  
219 colliculus [29-31], the enhanced responses at 80 Hz could point to disturbed sensory processing in  
220 these regions. Consistent with our findings, several studies have shown abnormal ABR measurements

221 related to wave III and V in tinnitus subjects [32-35]. For instance, Said [35] compared the ABR wave  
222 latencies between sensory-neural hearing loss (SNHL) patients with and without tinnitus, and  
223 observed enhanced latency of III-V peaks for tinnitus patients compared to no tinnitus control group.  
224 Since this study used subjects with SNHL in both groups, the longer wave V latency could not be the  
225 result of hearing loss and is most likely due to the pathophysiology underlying tinnitus [35]. This was  
226 further proven in tinnitus studies with no hearing deficits [34]. Considering that the origin of wave III  
227 and V ABR are cochlear nucleus and lateral lemniscus [34, 36, 37], these results support our findings  
228 of significantly enhanced 80 Hz steady state responses in tinnitus group.

229 Our analysis of 40 Hz ASSRs also proved elevated responses in tinnitus patients. The ASSRs elicited at  
230 this modulation rate are proven to be mainly generated at the primary auditory cortex, midbrain, and  
231 thalamus [30,38-41]. Given the difficulty in separating these sources when recording steady state  
232 responses, it is safe to consider the involvement of either or all these regions in abnormal sensory  
233 processing in idiopathic tinnitus. Several studies using other electrophysiological or imaging  
234 approaches have previously shown the elevated midbrain or cortex responses among tinnitus  
235 patients [42]. For instance, functional changes in auditory cortex have been observed in MRI [5,44,45]  
236 and PET studies [45] show changes in the auditory cortex activity in symmetric or asymmetric  
237 tinnitus. Furthermore, changes in grey matter in thalamic regions in tinnitus subjects are also  
238 reported [46]. Other ASSR studies have shown the elevated ASSR amplitudes regardless of carrier  
239 frequencies in auditory regions based on distress level experienced from tinnitus [47]. In the current  
240 study, we only included high distress patients with a VAS score higher than 7. Thus, observing high  
241 amplitude steady state responses at the measured MFs are not surprising.

242 Some studies have suggested that the changes in steady state response in tinnitus patients are  
243 related to attention [48]. In this study, we deviated all participants' attention during 20 and 40 Hz

244 ASSR by performing simple math problems. As both tinnitus patients and control group were similarly  
245 engaged in a task at lower MFs, we believe the changes in ASSR thresholds were not due to attention.  
246 This is further supported by another study which used N1 wave in magnetoencephalography (MEG)  
247 to investigate the effect of attention in tinnitus patients and found no attention-induced effect on N1  
248 wave in these patients [49].

249 We observed different effects on various CFs in 40 and 80 Hz ASSR with some CFs being more  
250 affected than the others in tinnitus subjects. As we were not able to identify the tinnitus frequency in  
251 the patients used in this study, it is not clear whether the differences between tinnitus patients and  
252 the control group at certain CFs were due to the interference with tinnitus sensation at a particular  
253 frequency. Studies on tonotopic organizations of 40 Hz ASSR have shown that with increase in the CF,  
254 the neural generators of ASSRs shift laterally on the auditory cortical regions [41]. In the current study  
255 we observed changes in ASSR thresholds in tinnitus patients compared to control to be affecting  
256 some CFs but not others. Considering that not all affected CFs were adjacent frequencies (1000 and  
257 4000 Hz in right vs 500 and 2000 in left) this might suggest a distribution in some tonotopic regions  
258 that could gradually spread to other tonotopic regions.

259 Our findings did not show any major difference in the obtained 20 Hz ASSR thresholds for idiopathic  
260 tinnitus and no-tinnitus control. Overall, the obtained thresholds in this MF were more enhanced  
261 compared to other MFs in both groups of tinnitus patients and control. This could be the result of  
262 challenges in creating a reliable EEG signal above the background noise at this MF [50] reported by  
263 different studies, which creates challenges in localizing the origin of these responses with high  
264 certainty [20].

265

266 **Steady state responses and tinnitus laterality**

267 Previous research has shown contradictory findings in comparing neuronal responses based on  
268 tinnitus laterality. For instance, fMRI studies on tinnitus subjects have previously shown abnormal IC  
269 activation in the side contralateral to the tinnitus percept side [11], while others have seen no  
270 asymmetry in activation pattern of this region in lateralized tinnitus patients [51]. Our findings  
271 support the latter, as we did not observe any significant differences between the thresholds acquired  
272 in any combination of MF and CF between the ipsi- and contralateral ASSR thresholds. The  
273 differences in the findings here and in previous studies could be further related to the tinnitus  
274 population under study. In the current study, we applied strict exclusion criteria to limit the  
275 population under study to those with idiopathic tinnitus. This removes many underlying factors such  
276 as SNHL that could contribute to tinnitus perception and laterality.

## 277 **Conclusion**

278 Tinnitus is suggested to be the result of an imbalance between inhibitory and excitatory processes in  
279 the midbrain, brainstem, and auditory cortex. These are the auditory brain regions where neural  
280 activity from somatosensory and auditory system interact. It has been proposed that such imbalance  
281 causes hyperexcitability that results in tinnitus perception [52]. Various medications have been used  
282 for alleviating tinnitus perception by targeting the underlying cause. Since effectiveness of such  
283 interventions largely relies on understanding the underlying cause of tinnitus, localizing auditory  
284 regions with sensory processing deficits in idiopathic tinnitus is crucial. Findings of this study supports  
285 involvement of multiple regions along the auditory pathway in these patients which could be the  
286 results of malfunction of a distributed network involving various brain areas in creating tinnitus  
287 sensation [20].

288

289

290 **Note**

291 **Conflict of Interest**

292 The authors declare that they have no conflict of interest.

293

294 **References**

- 295 1. Møller AR. Tinnitus: presence and future. *Prog Brain Res.* 2007;166:3-16. doi: 10.1016/S0079-  
296 6123(07)66001-4. PMID: 17956767.
- 297 2. Heller AJ. Classification and epidemiology of tinnitus. *Otolaryngol Clin North Am.* 2003  
298 Apr;36(2):239-48. doi: 10.1016/s0030-6665(02)00160-3. PMID: 12856294.
- 299 3. Sanchez TG, Medeiros IR, Levy CP, Ramalho Jda R, Bento RF. Tinnitus in normally hearing  
300 patients: clinical aspects and repercussions. *Braz J Otorhinolaryngol.* 2005 Jul-Aug;71(4):427-  
301 31. doi: 10.1016/s1808-8694(15)31194-0. Epub 2005 Dec 15. PMID: 16446955; PMCID:  
302 PMC9441966.
- 303 4. Levine RA, Nam EC, Oron Y, Melcher JR. Evidence for a tinnitus subgroup responsive to  
304 somatosensory based treatment modalities. *Prog Brain Res.* 2007;166:195-207. doi:  
305 10.1016/S0079-6123(07)66017-8. PMID: 17956783.
- 306 5. Mühlau M, Rauschecker JP, Oestreicher E, Gaser C, Röttinger M, Wohlschläger AM, Simon F,  
307 Etgen T, Conrad B, Sander D. Structural brain changes in tinnitus. *Cereb Cortex.* 2006  
308 Sep;16(9):1283-8. doi: 10.1093/cercor/bhj070. Epub 2005 Nov 9. PMID: 16280464.
- 309 6. Geven LI, de Kleine E, Willemsen AT, van Dijk P. Asymmetry in primary auditory cortex activity  
310 in tinnitus patients and controls. *Neuroscience.* 2014 Jan 3;256:117-25. doi:  
311 10.1016/j.neuroscience.2013.10.015. Epub 2013 Oct 23. PMID: 24161276.
- 312 7. Kovacs S, Peeters R, Smits M, De Ridder D, Van Hecke P, Sunaert S. Activation of cortical and  
313 subcortical auditory structures at 3 T by means of a functional magnetic resonance imaging  
314 paradigm suitable for clinical use. *Invest Radiol.* 2006 Feb;41(2):87-96. doi:  
315 10.1097/01.rli.0000189637.42344.09. PMID: 16428978.
- 316 8. Lanting CP, de Kleine E, van Dijk P. Neural activity underlying tinnitus generation: results from  
317 PET and fMRI. *Hear Res.* 2009 Sep;255(1-2):1-13. doi: 10.1016/j.heares.2009.06.009. Epub  
318 2009 Jun 21. PMID: 19545617.
- 319 9. Nava, E., and Roder, B. (2011). Adaptation and maladaptation insights from brain  
320 plasticity. *Prog. Brain Res.* 191, 177–194.
- 321 10. Maudoux A, Lefebvre P, Cabay JE, Demertzi A, Vanhauzenhuysse A, Laureys S, Soddu A.  
322 *Auditory resting-state network connectivity in tinnitus: a functional MRI study. PLoS One.*  
323 *2012;7(5):e36222. doi: 10.1371/journal.pone.0036222. Epub 2012 May 4. PMID: 22574141;*  
324 *PMCID: PMC3344851.*
- 325 11. Melcher JR, Sigalovsky IS, Guinan JJ Jr, Levine RA. Lateralized tinnitus studied with functional  
326 magnetic resonance imaging: abnormal inferior colliculus activation. *J Neurophysiol.* 2000  
327 Feb;83(2):1058-72. doi: 10.1152/jn.2000.83.2.1058. PMID: 10669517.
- 328 12. Eftekharian K, Sharifi G, Eftekharian A, Bidari-Zerehpooosh F. Contralateral tinnitus and hearing  
329 loss due to a tumor at the region of inferior colliculus: illustrative case. *J Neurosurg Case*

- 330 Lessons. 2022 Feb 21;3(8):CASE21624. doi: 10.3171/CASE21624. PMID: 36130546; PMCID:  
331 PMC9379620.
- 332 13. Almasabi F, Janssen MLF, Devos J, Moerel M, Schwartz M, Kotz SA, Jahanshahi A, Temel Y,  
333 Smit JV. The role of the medial geniculate body of the thalamus in the pathophysiology of  
334 tinnitus and implications for treatment. *Brain Res.* 2022 Mar 15;1779:147797. doi:  
335 10.1016/j.brainres.2022.147797. Epub 2022 Jan 17. PMID: 35051404.
- 336 14. Leaver AM, Renier L, Chevillet MA, Morgan S, Kim HJ, Rauschecker JP. Dysregulation of limbic  
337 and auditory networks in tinnitus. *Neuron.* 2011 Jan 13;69(1):33-43. doi:  
338 10.1016/j.neuron.2010.12.002. PMID: 21220097; PMCID: PMC3092532.
- 339 15. Brenner CA, Krishnan GP, Vohs JL, Ahn WY, Hetrick WP, Morzorati SL, O'Donnell BF. Steady  
340 state responses: electrophysiological assessment of sensory function in schizophrenia.  
341 *Schizophr Bull.* 2009 Nov;35(6):1065-77. doi: 10.1093/schbul/sbp091. Epub 2009 Sep 2. PMID:  
342 19726534; PMCID: PMC2762626.
- 343 16. O'Donnell BF, Vohs JL, Krishnan GP, Rass O, Hetrick WP, Morzorati SL. The auditory steady-  
344 state response (ASSR): a translational biomarker for schizophrenia. *Suppl Clin Neurophysiol.*  
345 2013;62:101-12. doi: 10.1016/b978-0-7020-5307-8.00006-5. PMID: 24053034; PMCID:  
346 PMC4959266.
- 347 17. Kozono N, Honda S, Tada M, Kirihara K, Zhao Z, Jinde S, Uka T, Yamada H, Matsumoto M, Kasai  
348 K, Mihara T. Auditory Steady State Response; nature and utility as a translational science tool.  
349 *Sci Rep.* 2019 Jun 11;9(1):8454. doi: 10.1038/s41598-019-44936-3. PMID: 31186500; PMCID:  
350 PMC6560088.
- 351 18. Korczak P, Smart J, Delgado R, Strobel TM, Bradford C. Auditory steady-state responses. *J Am*  
352 *Acad Audiol.* 2012 Mar;23(3):146-70. doi: 10.3766/jaaa.23.3.3. PMID: 22436114.
- 353 19. Purcell DW, John SM, Schneider SM, Picton TW (2004) Human temporal auditory acuity as  
354 assessed by envelope following responses. *J Acoust Soc Am* 116:3581–3593
- 355 20. Herdman AT, Lins O, Van Roon P, Stapells DR, Scherg M, Picton TW. Intracerebral sources of  
356 human auditory steady-state responses. *Brain Topogr.* 2002 Winter;15(2):69-86. doi:  
357 10.1023/a:1021470822922. PMID: 12537303.
- 358 21. Farahani ED, Wouters J, van Wieringen A. Brain mapping of auditory steady-state responses: A  
359 broad view of cortical and subcortical sources. *Hum Brain Mapp.* 2021 Feb 15;42(3):780-796.  
360 doi: 10.1002/hbm.25262. Epub 2020 Nov 9. PMID: 33166050; PMCID: PMC7814770.
- 361 22. Ghasemahmad Z, Farahani S. Validity of correction factors applied to auditory steady-state  
362 responses (ASSRs) in normal hearing adults in chartr EP system. *Eur Arch Otorhinolaryngol.*  
363 2019 Aug;276(8):2171-2180. doi: 10.1007/s00405-019-05451-3. Epub 2019 May 21. PMID:  
364 31115686.
- 365 23. Israelsson KE, Bogo R, Berninger E. Reliability in Hearing Threshold Prediction in Normal-  
366 Hearing and Hearing-Impaired Participants Using Mixed Multiple ASSR. *J Am Acad Audiol.*  
367 2015 Mar;26(3):299-310. doi: 10.3766/jaaa.26.3.9. PMID: 25751697.
- 368 24. Ozdek A, Karacay M, Saylam G, Tatar E, Aygener N, Korkmaz MH. Comparison of pure tone  
369 audiometry and auditory steady-state responses in subjects with normal hearing and hearing  
370 loss. *Eur Arch Otorhinolaryngol.* 2010 Jan;267(1):43-9. doi: 10.1007/s00405-009-1014-8.  
371 PMID: 19536554.
- 372 25. Alamanda M, Hohman MH. Auditory Steady-State Response. [Updated 2023 Oct 28]. In:  
373 *StatPearls* [Internet]. Treasure Island (FL): StatPearls Publishing; 2024 Jan-. Available from:  
374 <https://www.ncbi.nlm.nih.gov/books/NBK597346/>

- 375 26. Hatzopoulos S, Prosser S et al (2010) Threshold estimation in adult normal-and impaired-  
376 hearing subjects using auditory steady-state responses. *Med Sci Monit* 16:21–27
- 377 27. Alamanda, Monik, and Marc H. Hohman. "Auditory Steady-State Response." (2023).
- 378 28. Peterson, Diana C., Vamsi Reddy, and Renee N. Hamel. "Neuroanatomy, auditory pathway."  
379 (2018).
- 380 29. Cone-Wesson B, Dowell RC, Tomlin D, Rance G, Ming WJ. (2002) The auditory steady-state  
381 response: comparisons with auditory brainstem response. *J Am Acad Audiol* 13:173–187.
- 382 30. Herdman AT, Picton TW, Stapells DR. (2002) Place specificity of multiple auditory steady-state  
383 responses. *J Acoust Soc Am* 112:1569–1582.
- 384 31. Picton TW, John MS, Dimitrijevic A, Purcell D. (2003) Human auditory steady-state responses.  
385 *Int J Audiol* 42:177–219.
- 386 32. Omidvar S, Mahmoudian S, Khabazkhoob M, Ahadi M, Jafari Z. Tinnitus Impacts on Speech  
387 and Non-speech Stimuli. *Otol Neurotol*. 2018 Dec;39(10):e921-e928. doi:  
388 10.1097/MAO.0000000000002002. PMID: 30239441.
- 389 33. Lu J, West MB, Du X, Cai Q, Ewert DL, Cheng W, Nakmali D, Li W, Huang X, Kopke RD.  
390 Electrophysiological assessment and pharmacological treatment of blast-induced tinnitus.  
391 *PLoS One*. 2021 Jan 7;16(1):e0243903. doi: 10.1371/journal.pone.0243903. PMID: 33411811;  
392 PMCID: PMC7790300.
- 393 34. Jacxsens L, De Pauw J, Cardon E, van der Wal A, Jacquemin L, Gilles A, Michiels S, Van  
394 Rompaey V, Lammers MJW, De Hertogh W. Brainstem evoked auditory potentials in tinnitus:  
395 A best-evidence synthesis and meta-analysis. *Front Neurol*. 2022 Aug 22;13:941876. doi:  
396 10.3389/fneur.2022.941876. PMID: 36071905; PMCID: PMC9441610.
- 397 35. Said, Eman A. "Electrophysiological differences in sensorineural hearing loss patients with and  
398 without problem-tinnitus." *The Egyptian Journal of Otolaryngology* 28.1 (2012): 22-34.
- 399 36. Møller, Aage R., and P. J. Jannetta. "Neural generators of the auditory brainstem  
400 response." *The auditory brainstem response* (1985): 13-31.
- 401 37. Eggermont JJ. Auditory brainstem response. *Handb Clin Neurol*. 2019;160:451-464. doi:  
402 10.1016/B978-0-444-64032-1.00030-8. PMID: 31277868.
- 403 38. Johnson BW, Weinberg H, Ribary U, Cheyne DO, Ancill R. (1988) Topographic distribution of  
404 the 40 Hz auditory evoked-related potential in normal and aged subjects. *Brain Topogr* 1:117–  
405 121.
- 406 39. Hari R, HaˆmalaˆinenM, Joutsˆniemi SL. (1989) Neuromagnetic steadystate responses to  
407 auditory stimuli. *J Acoust Soc Am* 86:1033–1039
- 408 40. Maˆkelaˆ JP, Karmos G, Molnar M, Cseˆpe V, Winkler I. (1990) Steadystate responses from the  
409 cat auditory cortex. *Hear Res* 45:41–50.
- 410 41. Pantev C, Roberts LE, Elbert T, Ross B, Wienbruch C. Tonotopic organization of the sources of  
411 human auditory steady-state responses. *Hear Res*. 1996 Nov 1;101(1-2):62-74. doi:  
412 10.1016/s0378-5955(96)00133-5. PMID: 8951433.
- 413 42. Azevedo AA, Figueiredo RR, Penido NO. Tinnitus and event related potentials: a systematic  
414 review. *Braz J Otorhinolaryngol*. 2020 Jan-Feb;86(1):119-126. doi:  
415 10.1016/j.bjorl.2019.09.005. Epub 2019 Nov 4. PMID: 31753780; PMCID: PMC9422368.
- 416 43. Ma X, Chen N, Wang F, Zhang C, Dai J, Ding H, Yan C, Shen W, Yang S. Surface-based functional  
417 metrics and auditory cortex characteristics in chronic tinnitus. *Heliyon*. 2022 Oct  
418 8;8(10):e10989. doi: 10.1016/j.heliyon.2022.e10989. PMID: 36276740; PMCID: PMC9582700.

- 419 44. Giraud AL, Chéry-Croze S, Fischer G, Fischer C, Vighetto A, Grégoire MC, Lavenne F, Collet L. A  
420 selective imaging of tinnitus. *Neuroreport*. 1999 Jan 18;10(1):1-5. doi: 10.1097/00001756-  
421 199901180-00001. PMID: 10094123.
- 422 45. Arnold W, Bartenstein P, Oestreicher E, Römer W, Schwaiger M. Focal metabolic activation in  
423 the predominant left auditory cortex in patients suffering from tinnitus: a PET study with  
424 [18F]deoxyglucose. *ORL J Otorhinolaryngol Relat Spec*. 1996 Jul-Aug;58(4):195-9. doi:  
425 10.1159/000276835. PMID: 8883104.
- 426 46. Landgrebe M, Langguth B, Rosengarth K, Braun S, Koch A, Kleinjung T, May A, de Ridder D,  
427 Hajak G. Structural brain changes in tinnitus: grey matter decrease in auditory and non-  
428 auditory brain areas. *Neuroimage*. 2009 May 15;46(1):213-8. doi:  
429 10.1016/j.neuroimage.2009.01.069. Epub 2009 Feb 12. PMID: 19413945.
- 430 47. Sadeghijam M, Moossavi A, Akbari M, Yousefi A, Haghani H. Effect of tinnitus distress on  
431 auditory steady-state response amplitudes in chronic tinnitus sufferers. *J Clin Neurosci*. 2022  
432 Mar;97:49-55. doi: 10.1016/j.jocn.2021.11.014. Epub 2022 Jan 13. PMID: 35033781.
- 433 48. Paul BT, Bruce IC, Bosnyak DJ, Thompson DC, Roberts LE. Modulation of electrocortical brain  
434 activity by attention in individuals with and without tinnitus. *Neural Plast*. 2014;2014:127824.  
435 doi: 10.1155/2014/127824. Epub 2014 Jun 12. PMID: 25024849; PMCID: PMC4082949.
- 436 49. Diesch E, Andermann M, Rupp A. Is the effect of tinnitus on auditory steady-state response  
437 amplitude mediated by attention? *Front Syst Neurosci*. 2012 May 21;6:38. doi:  
438 10.3389/fnsys.2012.00038. PMID: 22661932; PMCID: PMC3357113.
- 439 50. Picton, T.W., Skinner, C.R., Champagne, S.C., Kellett, A.J. and Maiste, A.C. Potentials evoked by  
440 the sinusoidal modulation of the amplitude or frequency of a tone. *J. Acoust. Soc. Am.*, 1987,  
441 82: 165-178.
- 442 51. Melcher JR, Levine RA, Bergevin C, Norris B. The auditory midbrain of people with tinnitus:  
443 abnormal sound-evoked activity revisited. *Hear Res*. 2009 Nov;257(1-2):63-74. doi:  
444 10.1016/j.heares.2009.08.005. Epub 2009 Aug 20. PMID: 19699287; PMCID: PMC2760154.
- 445 52. Eggermont JJ. Tinnitus: neurobiological substrates. *Drug Discov Today*. 2005 Oct  
446 1;10(19):1283-90. doi: 10.1016/S1359-6446(05)03542-7. PMID: 16214672.
- 447 53. Luts H, Desloovere C, Wouters J. Clinical application of dichotic multiple-stimulus auditory  
448 steady-state responses in high-risk newborns and young children. *Audiol Neurootol*.  
449 2006;11(1):24-37. doi: 10.1159/000088852. Epub 2005 Oct 10. PMID: 16219992.
- 450 54. Picton TW, John MS, Dimitrijevic A, Purcell D. Human auditory steady-state responses. *Int J*  
451 *Audiol*. 2003 Jun;42(4):177-219. doi: 10.3109/14992020309101316. PMID: 12790346.
- 452 55. Usui K, Kirihara K, Araki T, Tada M, Koshiyama D, Fujioka M, Nishimura R, Ando S, Koike S,  
453 Sugiyama H, Shirakawa T, Toriyama R, Masaoka M, Fujikawa S, Endo K, Yamasaki S, Nishida A,  
454 Kasai K. Longitudinal change in mismatch negativity (MMN) but not in gamma-band auditory  
455 steady-state response (ASSR) is associated with psychological difficulties in adolescence.  
456 *Cereb Cortex*. 2023 Nov 4;33(22):11070-11079. doi: 10.1093/cercor/bhad346. PMID:  
457 37815245; PMCID: PMC10631957.
- 458 56. Rampp S, Rensch L, Simmermacher S, Rahne T, Strauss C, Prell J. Intraoperative auditory  
459 steady-state monitoring during surgery in the cerebellopontine angle for estimation of  
460 postoperative hearing classes. *J Neurosurg*. 2017 Sep;127(3):559-568. doi:  
461 10.3171/2016.7.JNS16460. Epub 2016 Oct 14. PMID: 27739939.
- 462



463

464

465 **Figure and table legends:**

466

467

468 **Table 1**

469 Summary of the criteria for inclusion or exclusion from the study.

470

471 **Table 2**

472 Mean values (Mean), standard deviation (SD) and range (Range) of auditory steady state responses  
473 (ASSR) in dB SPL for modulation frequencies of 20, 40, 80 Hz and in carrier frequencies 500-4000 Hz in  
474 ipsi- and contralateral ear to tinnitus ear in patients with subjective idiopathic tinnitus, n=19 subjects.

475

476

477 **Fig. 1**

478 Scatterplots represent the acquired auditory steady state response (ASSR) thresholds for ipsi- and  
479 contralateral ear to the tinnitus ear. Each circle represents measurement from one subject at that  
480 combination of MF and CF. Each row represents measurements for one of the modulation frequencies  
481 20,40, and 80 Hz. The corresponding carrier frequencies 500, 1000, 2000, and 4000 Hz are shown at  
482 the top of each panel. the darkness of the color in each circle represents overlapping datapoints (n=19  
483 subjects).

484

485 **Table 3**

486 Statistical analysis results (z statistics and P-value) for comparing ipsi- vs contralateral thresholds  
487 measured with auditory steady state responses (ASSRs) in dB SPL based on the tested modulation  
488 frequency (MF) and carrier frequency (CF) using Wilcoxon signed rank test (n=19 patients).

489

490

491

492 **Fig. 2**

493 Boxplots represent the distribution of the thresholds for auditory steady state response (ASSR)  
494 thresholds for 500, 1000, 2000, and 4000 Hz. The tested modulation frequency is represented on the  
495 left side of each row. Each single boxplot represents the distribution of the thresholds between the  
496 first and third quartile, whiskers represent minimum, and maximum of the data and outliers are shown  
497 as a dot at the bottom or top of each boxplot. (n=19 subjects, for all comparisons \*p<0.05, \*\*p<0.01,  
498 \*\*\*p<0.001)

499

500 **Table 4**

501 Statistical analysis results (Chi-Square and P-value) for comparing estimated right and left ASSR  
502 thresholds (dB SPL) between idiopathic tinnitus and normal hearing-no tinnitus control groups using  
503 Kruskal Wallis test (n=19 patients).

504

505

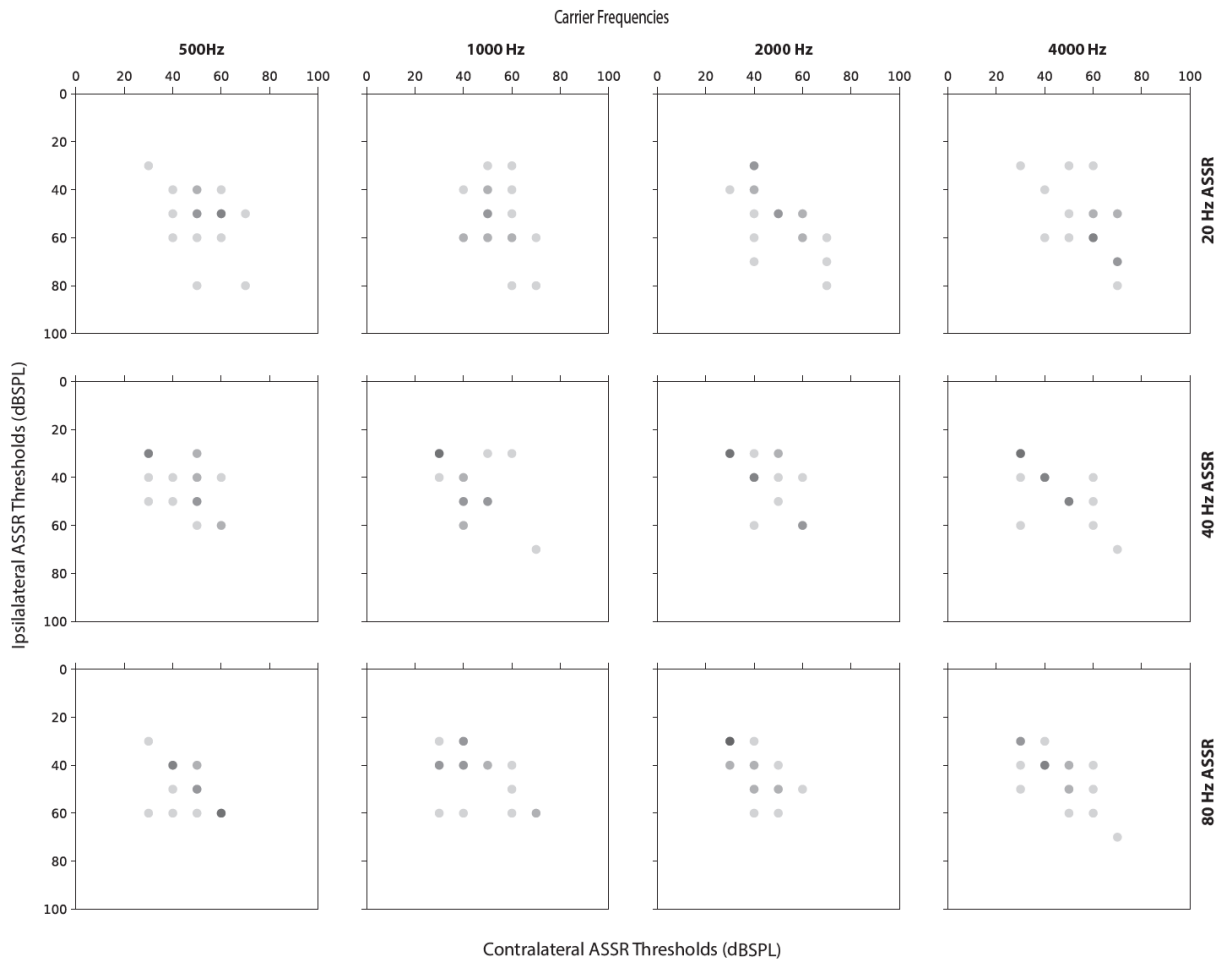

**Fig. 1**

Scatterplots representing the acquired Auditory Steady State Response (ASSR) thresholds for Ipsi and Contralateral ear to the tinnitus ear. Each circle represents measurement from one subject at that combination of MF and CF. Each row represents measurements for one of the modulation frequencies 20Hz,40Hz, and 80Hz. The corresponding carrier frequencies 500, 1000, 2000, and 4000 Hz are shown at the top of each panel. the darkness of the color in each circle represents overlapping datapoints (n=19 subjects).

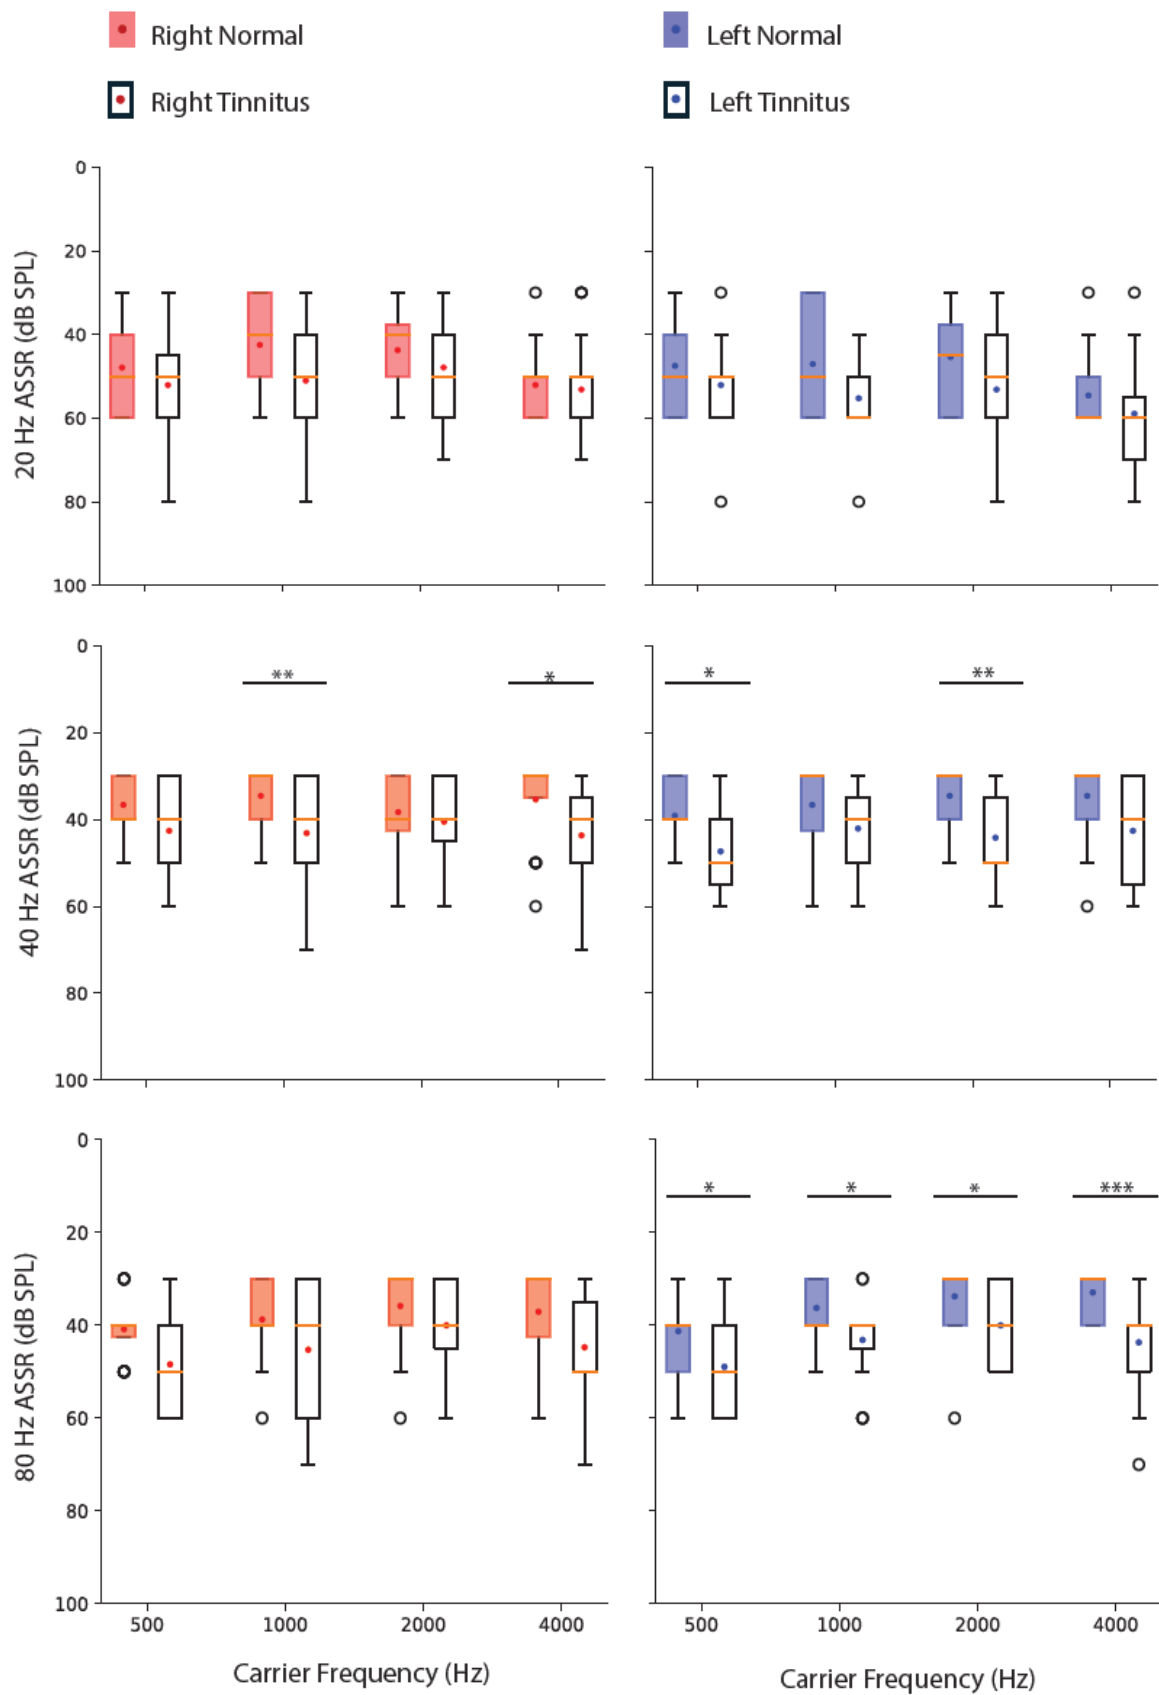

Fig 2.

Boxplots represent the distribution of the thresholds for Auditory Steady State Response (ASSR) thresholds for 500, 1000, 2000, and 4000Hz. The tested modulation frequency is represented on the left side of each row. Each single boxplot represents the distribution of the thresholds between the first and third quartile, whiskers represent minimum, and maximum of the data and outliers are shown as a dot at the bottom or top of each boxplot. (n=19 subjects, for all comparisons \*p<0.025, \*\*p<0.005, \*\*\*p<0.0001)

## List of inclusion criteria

---

- Pure tone audiometry (PTA) hearing thresholds at 250-8000Hz < 20 dB
- Tinnitus Handicap Inventory Questionnaire (THI) and Tinnitus Questionnaire (TQ) scores >44
- Average loudness matching of tinnitus > 8
- Average intensity index of tinnitus based on the VAS criteria > 7 / 10
- No treatment for tinnitus during past 3 months
- The absence of any head and neck diseases, space occupying lesions, or any organic disease that could cause tinnitus
- The absence of any history of psychiatric disorders
- The absence of any history of dementia or seizure

**Table 1:** Summary of the criteria for inclusion or exclusion from the study.

|                           |    | Carrier Frequency (Hz) |        |       |        |       |        |       |        |       |
|---------------------------|----|------------------------|--------|-------|--------|-------|--------|-------|--------|-------|
|                           |    | 500                    |        | 1000  |        | 2000  |        | 4000  |        |       |
|                           |    | Ipsi                   | Contra | Ipsi  | Contra | Ipsi  | Contra | Ipsi  | Contra |       |
| Modulation Frequency (HZ) | 20 | Mean                   | 51.6   | 52.6  | 52.6   | 53.7  | 51.0   | 50    | 54.2   | 57.9  |
|                           |    | SD                     | 12.6   | 10.4  | 14.1   | 8.9   | 14.1   | 12.5  | 14.3   | 11.9  |
|                           |    | Range                  | 30-80  | 30-70 | 30-80  | 40-70 | 30-80  | 30-70 | 30-80  | 30-70 |
|                           | 40 | Mean                   | 42.6   | 44.2  | 43.2   | 41.6  | 40.5   | 43.7  | 43.7   | 43.2  |
|                           |    | SD                     | 11.0   | 11.2  | 12.5   | 11.2  | 11.8   | 11.2  | 11.6   | 12.9  |
|                           |    | Range                  | 30-60  | 30-70 | 30-70  | 30-60 | 30-60  | 30-70 | 30-70  | 30-60 |
|                           | 80 | Mean                   | 50     | 47.4  | 43.7   | 44.7  | 41.1   | 38.9  | 43.7   | 44.7  |
|                           |    | SD                     | 10     | 9.9   | 11.2   | 13.5  | 10.5   | 9.4   | 11.2   | 12.2  |
|                           |    | Range                  | 30-60  | 30-60 | 30-60  | 30-70 | 30-60  | 30-60 | 30-70  | 30-70 |

**Table 2:** Mean values (Mean), standard deviation (SD) and range (Range) of Auditory Steady State Responses (ASSR) in dB SPL for modulation frequencies of 20, 40, 80Hz and in carrier frequencies 500-4000Hz in ipsi- and contralateral ear to tinnitus ear in patients with subjective idiopathic tinnitus, n=19 subjects.

|                      |       |         | Carrier Frequency |         |         |         |
|----------------------|-------|---------|-------------------|---------|---------|---------|
|                      |       |         | 500 Hz            | 1000 Hz | 2000 Hz | 4000 Hz |
| Modulation Frequency | 20 Hz | Z       | -0.47             | -0.25   | -0.28   | -1.33   |
|                      |       | p-value | 0.64              | 0.80    | 0.8     | 0.18    |
|                      | 40 Hz | Z       | -0.73             | -0.57   | -1.3    | -0.18   |
|                      |       | p-value | 0.46              | 0.57    | 0.2     | 0.8     |
|                      | 80 Hz | Z       | -1.19             | -0.53   | -1.15   | -0.51   |
|                      |       | p-value | 0.24              | 0.6     | 0.25    | 0.61    |

**Table 3:** Statistical analysis results (z statistics and P-value) for comparing ipsi- vs contralateral thresholds measured with auditory steady state responses (ASSRs) in dB SPL based on the tested modulation frequency (MF) and carrier frequency (CF) using Wilcoxon signed rank test (n=19 patients).



|                           |    | Carrier Frequency (Hz) |            |       |       |       |        |
|---------------------------|----|------------------------|------------|-------|-------|-------|--------|
|                           |    | 500                    | 1000       | 2000  | 4000  |       |        |
| Modulation Frequency (Hz) | 20 | R                      | Chi-Square | 0.83  | 4.2   | 1.07  | 0.24   |
|                           |    |                        | p-value    | 0.36  | 0.04  | 0.3   | 0.6    |
|                           |    | L                      | Chi-Square | 0.87  | 2.26  | 3.1   | 2.76   |
|                           |    |                        | p-value    | 0.35  | 0.13  | 0.08  | 0.09   |
|                           | 40 | R                      | Chi-Square | 3.2   | 5.6   | 0.21  | 6.98   |
|                           |    |                        | p-value    | 0.07  | 0.02  | 0.65  | 0.008  |
|                           |    | L                      | Chi-Square | 7.2   | 3.8   | 9.3   | 4.47   |
|                           |    |                        | p-value    | 0.007 | 0.051 | 0.002 | 0.03   |
|                           | 80 | R                      | Chi-Square | 6.0   | 1.1   | 1.6   | 5.0    |
|                           |    |                        | p-value    | 0.1   | 0.3   | 0.2   | 0.03   |
|                           |    | L                      | Chi-Square | 6.86  | 7.16  | 6.35  | 13.0   |
|                           |    |                        | p-value    | 0.009 | 0.007 | 0.01  | 0.0001 |

**Table 4:** Statistical analysis results (Chi-Square and P-value) for comparing estimated right and left ASSR thresholds (dB SPL) between idiopathic tinnitus and normal hearing-no tinnitus control groups using Kruskal Wallis test (n=19 patients). Significant p-values < 0.025.
